# Supplementary material for: Porphyrin functionalized bismuth ferrite for enhanced solar light photocatalysis
Source: Royal Society of Chemistry journal article supplement (doi:10.1039/c9dt04514g), 2020-01-01
Supplement: c9dt04514g1.pdf [file c9dt04514g1.pdf]

## Electronic Supplementary Information

# Porphyrin functionalized Bismuth Ferrite for enhanced solar light photocatalysis

C. Tudisco,<sup>a,\*</sup> L. Pulvirenti,<sup>b</sup> P. Cool,<sup>a</sup> G. G. Condorelli<sup>b,\*</sup>

<sup>a</sup>Laboratory of Adsorption and Catalysis, Department of Chemistry, University of Antwerpen (CDE), Universiteitsplein 1, 2610 Wilrijk, Antwerpen, Belgium

<sup>b</sup>Dipartimento di Scienze Chimiche, Università di Catania and INSTM UdR Catania, Viale Andrea Doria 6, 95125 Catania, Italy

\*Corresponding author

[guido.condorelli@unict.it](mailto:guido.condorelli@unict.it) (G.G. Condorelli).

[cristina.tudisco@uantwerpen.be](mailto:cristina.tudisco@uantwerpen.be) (C. Tudisco)

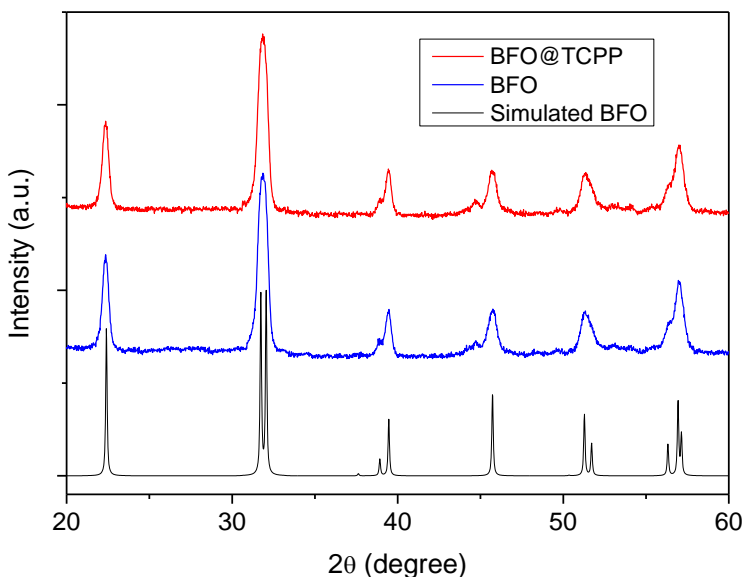

**Figure S1.** XRD patterns of bare BFO (blue line) and TCPP-functionalized BFO (red line) powders. The simulated spectrum calculated from ICDD data (Card No 20-0169) of the BFO rhombohedral structure (space group R3c) was also added at the bottom (black line).

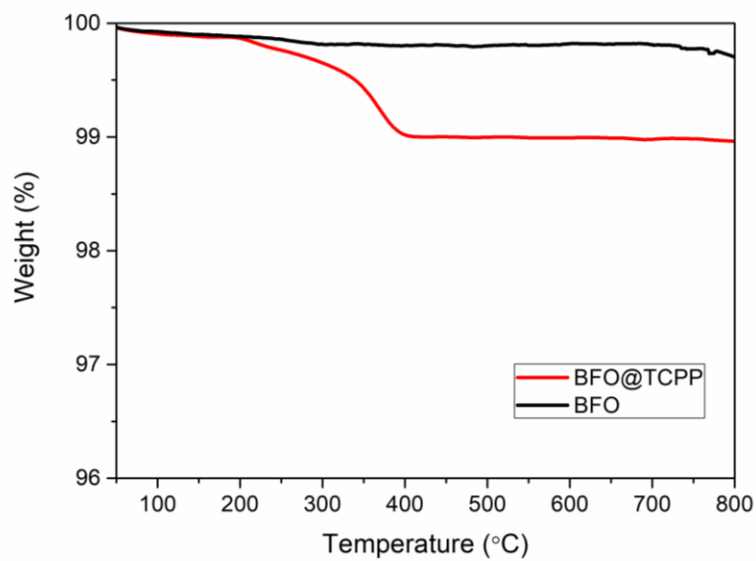

**Figure S2.** TGA curves of bare BFO (black line) and TCPP-functionalized BFO (red line) powders.

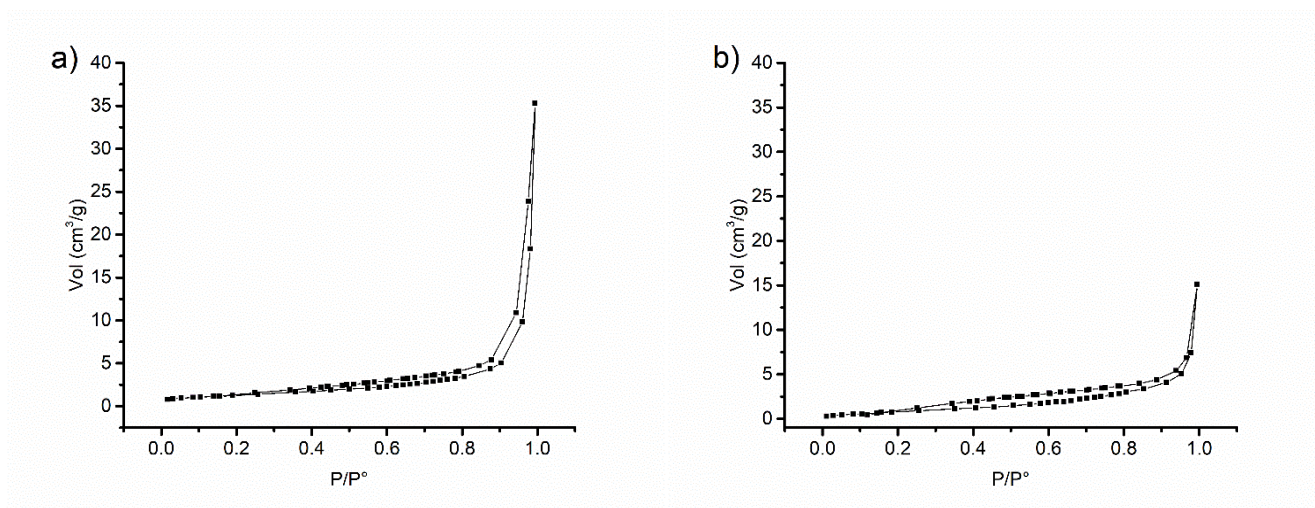

**Figure S3.** N<sub>2</sub> adsorption isotherms of (a) BFO and (b) TCPP@BFO powders.

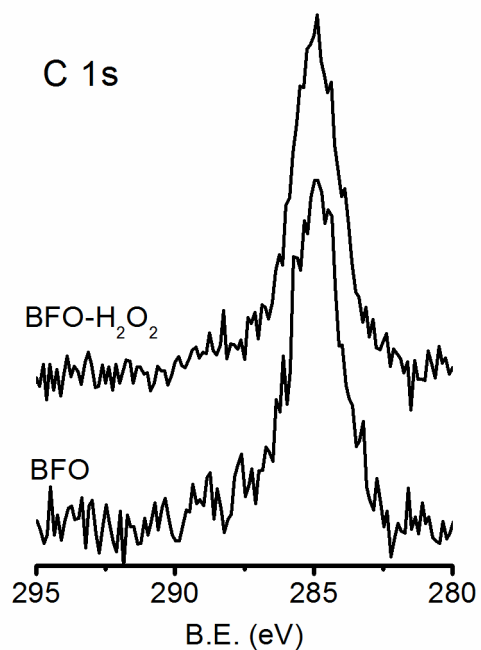

**Figure S4.** C 1s XPS region of bare BFO (bottom) and BFO-H<sub>2</sub>O<sub>2</sub> (upper).

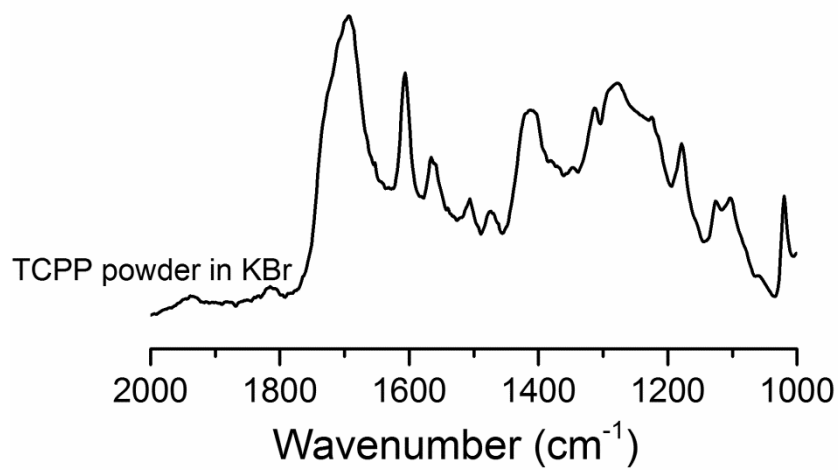

**Figure S5.** FTIR spectrum in the 2000-1000 cm<sup>-1</sup> range of TCP powder in KBr

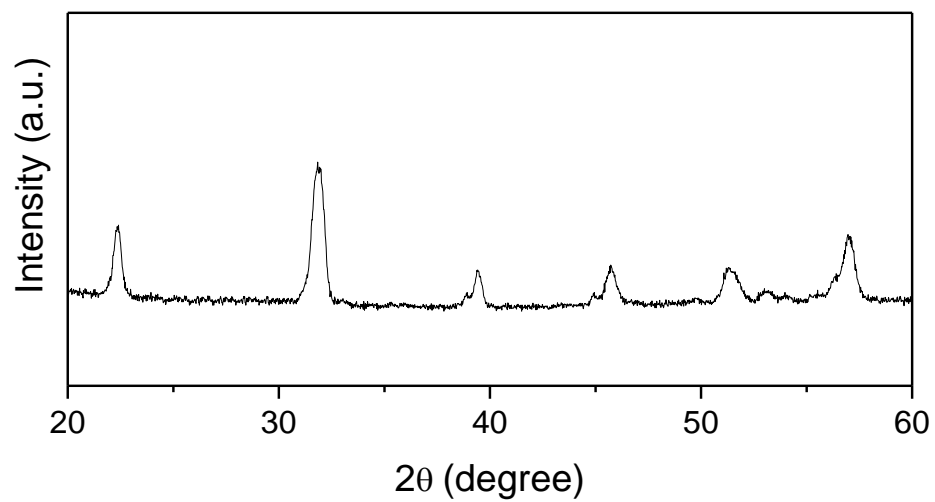

**Figure S6.** XRD patterns of TCPF-functionalized BFO powders after four degradation cycles of MB degradation.

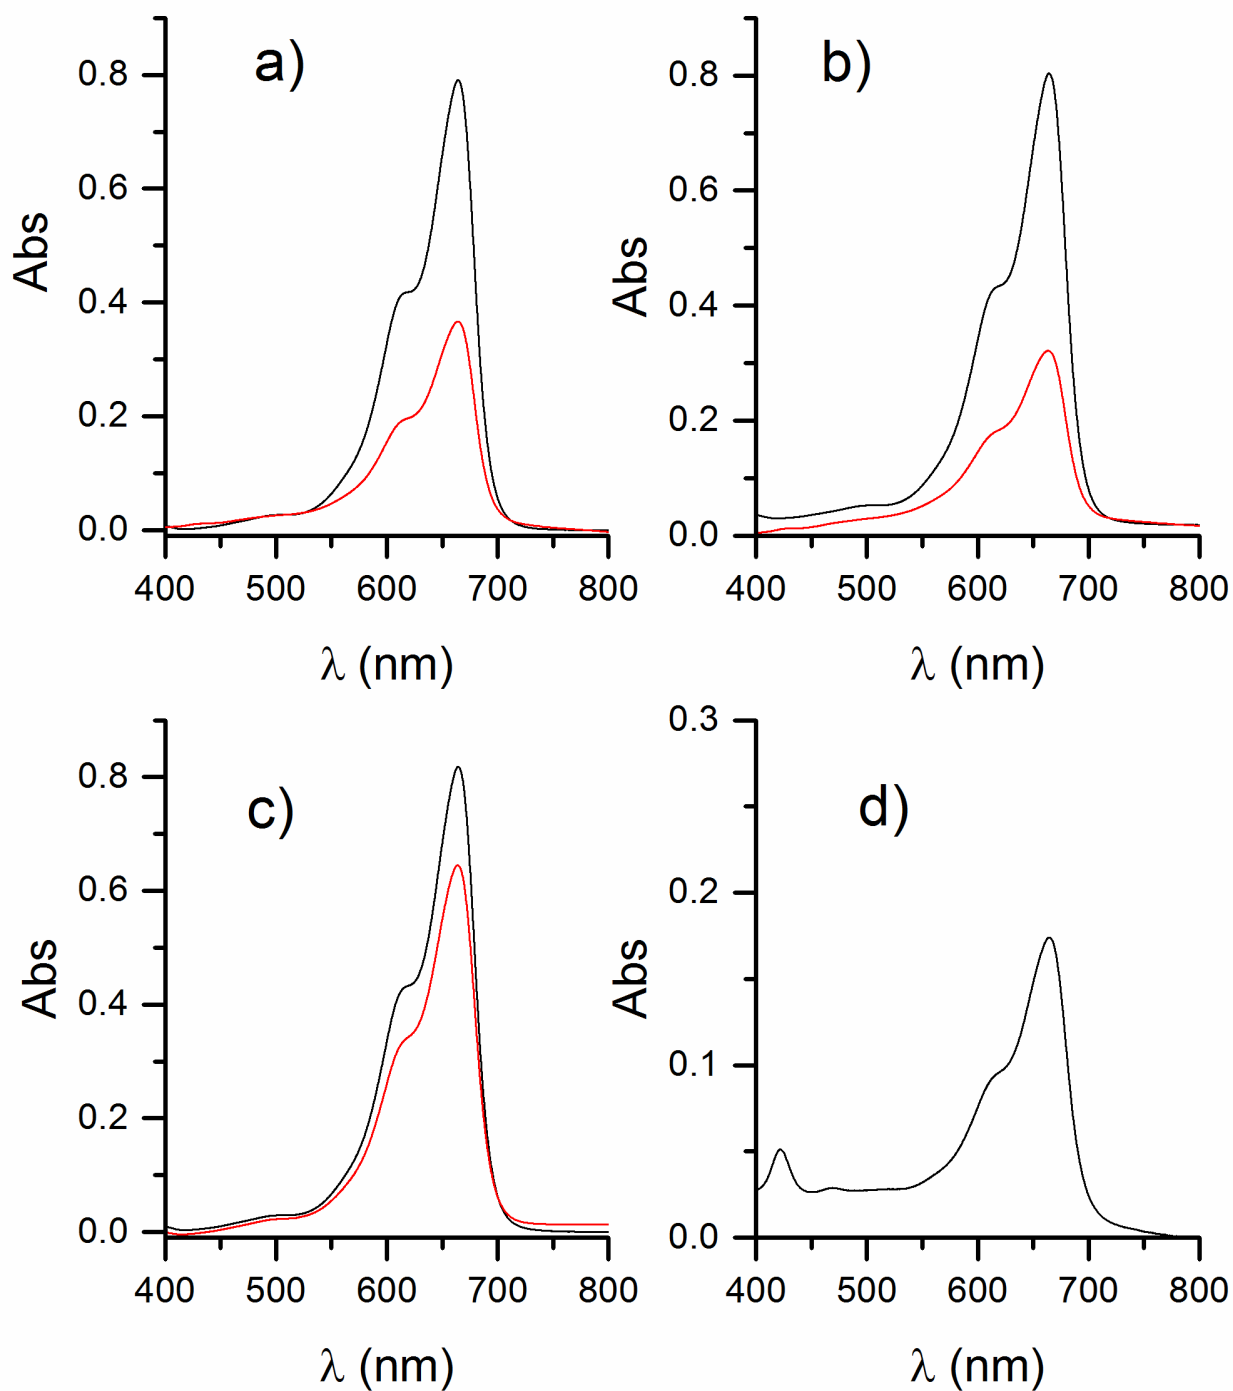

**Figure S7.** UV-Vis spectra of MB solution ( $10^{-5}$  M) at a) pH=7, b) pH=12 and c) pH=3 at the beginning (black line) and after 240 min (red line) of the photocatalytic process in the presence of TCPP@BFO. d) The UV-Vis spectrum of a solution of MB ( $2 \times 10^{-6}$  M) and free TCPP ( $2 \times 10^{-7}$  M) is reported as reference.

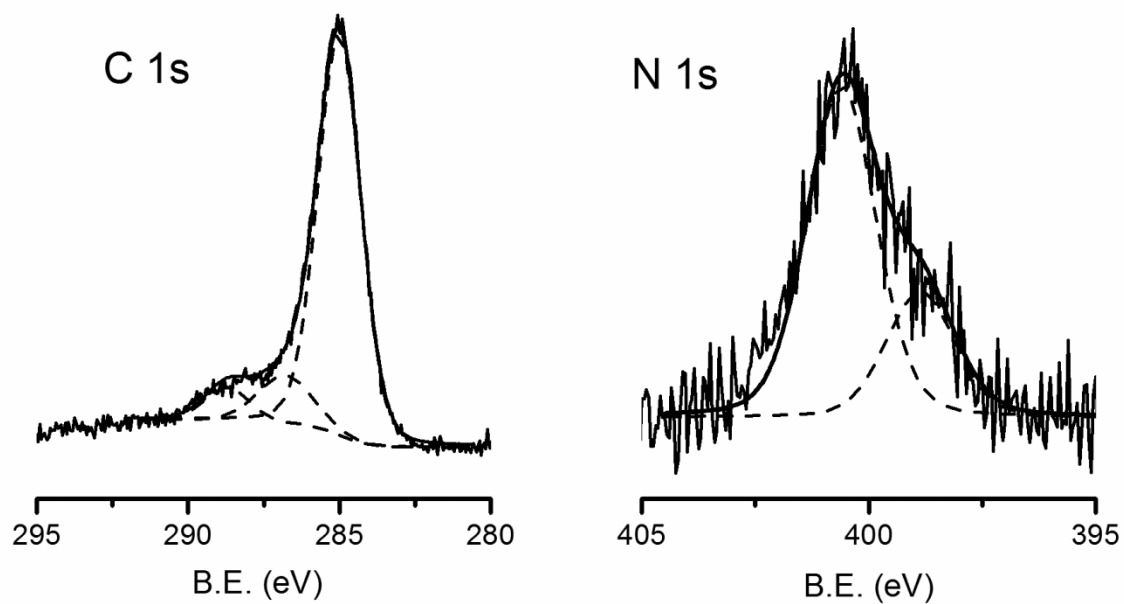

**Figure S8.** C1s (left) and N1s (right) XPS spectral regions of TCPP@BFO after the photocatalytic process at pH 3. Similar spectra are obtained after the photocatalytic process at pH 7.
